# Supplementary material for: Assessment of the ecotoxicity of urban estuarine sediment using benthic and pelagic copepod bioassays
Source: PeerJ. 2018 May 30;6:e4936. doi: 10.7717/peerj.4936 (PMC5984583; doi:10.7717/peerj.4936)
Supplement: Supplemental Information 9 [file peerj-06-4936-s009.xlsx]

## Sheet: Elutriates
ELUTRIATES FROM ALL SAMPLED SITES IN AHURIRI ESTUARY, TRIBUTARIES AND WAITANGI ESTUARY											2017-09-20
Larval Development Ratio Test (Normalized to % control)											Normalization
Offspring		Treatment	Date	pH	Redox Abs (mV)	Total	Nauplii final	Copepodite final	% Copepodites	% Control	Mean	S.D.
		Control	2017-09-20	8.02	-	116	41	71	60.6838	92.8105
Rep 1	116	Control	2017-09-20	8.02	-	118	51	67	57.265	87.5817
Rep 2	118	Control	2017-09-20	8.02	-	122	36	86	73.5043	112.418	97.6035	13.0937
Rep 3	122	Old T est	2017-09-20	8.02	246	73	12	61	52.1368	79.7386
Rep 4		Old T est	2017-09-20	8.02	246	74	23	51	43.5897	66.6667
Rep 5		Old T est	2017-09-20	8.02	246	96	32	64	54.7009	83.6601	76.6885	8.89786
MEAN	117	Old T Riverbed	2017-09-20	8.02	253.6	64	40	24	20.5128	31.3725
MEAN - Rounded	117	Old T Riverbed	2017-09-20	8.02	253.6	81	49	32	27.3504	41.8301
SD	1.41421	Old T Riverbed	2017-09-20	8.02	253.6	68	45	23	19.6581	30.0654	34.4227	6.44821
HIGH LIMIT	120	Hum Estuary	2017-09-20	8.02	252.1	91	38	53	45.2991	69.281
LOWLIMIT	114	Hum Estuary	2017-09-20	8.02	252.1	76	36	40	34.188	52.2876
PASS / FAIL	FAIL	Hum Estuary	2017-09-20	8.02	252.1	57	13	44	37.6068	57.5163	59.695	8.7037
(Pass / Fail + - 2 SD)		Hum Drain	2017-09-20	8.03	230	79	34	45	38.4615	58.8235
		Hum Drain	2017-09-20	8.03	230	76	20	56	47.8632	73.2026
		Hum Drain	2017-09-20	8.03	230	84	45	39	33.3333	50.9804	61.0022	11.2702
		Waitangi Estuary	2017-09-20	8.06	212.7	69	2	67	57.265	87.5817
		Waitangi Estuary	2017-09-20	8.06	212.7	88	1	87	74.359	113.725
		Waitangi Estuary	2017-09-20	8.06	212.7	86	3	83	70.9402	108.497	100.654	18.4865
										Average Control
										65.3846
ELUTRIATES FROM ALL SAMPLED SITES IN AHURIRI ESTUARY, TRIBUTARIES AND WAITANGI ESTUARY
Survival test (Normalized to % control)
Treatment	Date	pH	Total initial	Redox Abs (mV)	Total F Alive	Total mortality Final	% Alive	Mean	S.D.	% Control
Control	2017-09-20	8.02	120	-	116	4	96.5572			94.1433
Control	2017-09-20	8.02	120	-	118	2	100.855			98.3333
Control	2017-09-20	8.02	120	-	122	-2	104.274	100.562	3.86646	101.667
Old T est	2017-09-20	8.02	120	246	73	47	62.3932			60.8333
Old T est	2017-09-20	8.02	120	246	74	46	63.2479			61.6667
Old T est	2017-09-20	8.02	120	246	96	24	82.0513	69.2308	11.1111	80
Old T Riverbed	2017-09-20	8.02	120	246	64	56	54.7009			53.3333
Old T Riverbed	2017-09-20	8.02	120	253.6	81	39	69.2308			67.5
Old T Riverbed	2017-09-20	8.02	120	253.6	68	52	58.1197	60.6838	7.59675	56.6667
Hum Estuary	2017-09-20	8.02	120	253.6	91	29	77.7778			75.8333
Hum Estuary	2017-09-20	8.02	120	252.1	76	44	64.9573			63.3333
Hum Estuary	2017-09-20	8.02	120	252.1	57	63	48.7179	63.8177	14.5634	47.5
Hum Drain	2017-09-20	8.02	120	252.1	79	41	67.5214			65.8333
Hum Drain	2017-09-20	8.03	120	230	76	44	64.9573			63.3333
Hum Drain	2017-09-20	8.03	120	230	84	36	71.7949	68.0912	3.45423	70
Waitangi Estuary	2017-09-20	8.03	120	230	69	51	58.9744			57.5
Waitangi Estuary	2017-09-20	8.06	120	212.7	88	32	75.2137			73.3333
waitangi Estuary	2017-09-20	8.06	120	212.7	86	34	73.5043	69.2308	8.92334	71.6667
							Ave Cont	102.564

## Sheet: Sediments
POTENTIAL OFFSPRING
Date: 3 Aug - 24 Oct
SPECIES: Quinquelaophonte sp
								Normalization
	Potential offspring			Conc	Gravid	Potential	%Offspring	% Control	Mean	S.D.
				Cont	2	32	50	50
	Rep 1	32		Cont	7	112	175	175
	Rep 2	112		Cont	6	96	150	150	125	66.1438
	Rep 3	96		Wai	7	112	175	175
	Rep 4	16		Wai	0	0	0	0
	Rep 5			Wai	2	32	50	50
	MEAN	64		Wai	0	0	0	0	56.25	82.6009
	MEAN - Rounded	64		Hum Dr	0	0	0	0
	SD	42.332		Hum Dr	0	0	0	0
	HIGH LIMIT	149		Hum Dr	0	0	0	0	0	0
	LOWLIMIT	-21		Hum Est	0	0	0	0
	PASS / FAIL	PASS		Hum Est	1	16	25	25
	(Pass / Fail + - 2 SD)			Hum Est	0	0	0	0	8.33333	14.4338
				OT River	0	0	0	0
				OT River	0	0	0	0
				OT River	0	0	0	0	0	0
	Average Control % Survival			OT Est	3	48	75	75
				OT Est	1	16	25	25
				OT Est	0	0	0	0	33.3333	38.1881
										Average control
										100
ADULT SURVIVAL
Date: 3 Aug - 24 Oct
SPECIES: Quinquelaophonte sp
											Normalization
Adult survival			Conc	Total adult i	Total Adult final	Adult surv	Offspring	Gravid	Potential	% Adult surv	% Control	Mean	S.D.
			Cont	30	25	25	24	2	32	96.1538	98.6842
Rep 1	25		Cont	30	26	26	25	7	112	100	102.632
Rep 2	26		Cont	30	25	25	34	6	96	96.1538	98.6842
Rep 3	25		Cont	30	27	27	42	1	16	103.846	106.579	101.645	3.77932
Rep 4	27		Wai	30	23	23	38	7	112	88.4615	90.7895
Rep 5			Wai	30	26	26	46	0	0	100	102.632
MEAN	25.75		Wai	30	15	15	55	2	32	57.6923	59.2105
MEAN - Rounded	26		Wai	30	29	29	46	0	0	111.538	114.474	91.7763	23.7663
SD	0.57735		Hum Dr	30	0	0	0	0	0	0	0
HIGH LIMIT	27		Hum Dr	30	0	0	0	0	0	0	0
LOWLIMIT	25		Hum Dr	30	0	0	0	0	0	0	0	0	0
PASS / FAIL	PASS		Hum Est	30	3	3	0	0	0	11.5385	11.8421
(Pass / Fail + - 2 SD)			Hum Est	30	2	2	0	1	16	7.69231	7.89474
			Hum Est	30	2	2	0	0	0	7.69231	7.89474	9.21053	2.27901
			OT River	30	0	0	0	0	0	0	0
			OT River	30	0	0	0	0	0	0	0
			OT River	30	0	0	0	0	0	0	0	0	0
			OT Est	30	26	26	41	3	48	100	102.632
			OT Est	30	23	23	26	1	16	88.4615	90.7895
			OT Est	30	25	25	36	0	0	96.1538	98.6842	97.3684	6.0297
										Average control
										97.4359
OFFSPRING SUCCESS
Date: 3 Aug - 24 Oct
SPECIES: Quinquelaophonte sp
							Normalization
	Offspring success			Conc	Offspring	%Offspring	% Control	Mean	S.D.
				Cont	24	77.4194	76.8
	Rep 1	24		Cont	25	80.6452	80
	Rep 2	25		Cont	34	109.677	108.8
	Rep 3	34		Cont	42	135.484	134.4	100	27.0742
	Rep 4	42		Wai	38	122.581	121.6
	Rep 5			Wai	46	148.387	147.2
	MEAN	31.25		Wai	55	177.419	176
	MEAN - Rounded	31		Wai	46	148.387	147.2	148	22.2279
	SD	5.50757		Hum Dr	0	0	0
	HIGH LIMIT	42		Hum Dr	0	0	0
	LOWLIMIT	20		Hum Dr	0	0	0	0	0
				Hum Est	0	0	0
				Hum Est	0	0	0
				Hum Est	0	0	0	0	0
				OT River	0	0	0
				OT River	0	0	0
				OT River	0	0	0	0	0
				OT Est	41	132.258	131.2
				OT Est	26	83.871	83.2
				OT Est	36	116.129	115.2	109.867	24.4404
									Average control
									100.806
